# Supplementary material for: SNP-SNP Interaction in Genes Encoding PD-1/PD-L1 Axis as a Potential Risk Factor for Clear Cell Renal Cell Carcinoma
Source: PubMed Central journal article supplement (PMC7760680; doi:10.3390/cancers12123521), 2020-11-26
Supplement: cancers-12-03521-s001.pdf [file cancers-12-03521-s001.pdf]

*Supplementary Materials*

# **SNP-SNP Interaction in Genes Encoding PD-1/PD-L1 Axis as a Potential Risk Factor for Clear Cell Renal Cell Carcinoma**

**Marta Wagner, Krzysztof Tupikowski, Monika Jasek, Anna Tomkiewicz, Agata Witkowicz, Kuba Ptaszkowski, Pawel Karpinski, Romuald Zdrojowy, Agnieszka Halon and Lidia Karabon**

**Table S1.** Genotype distribution of investigated *PDCD1* and *PD-L1* polymorphisms in Renal Cell Carcinoma (RCC) patients and controls.

| Gene                | Polymorphisms       | Genotype         | RCC patients (N = 237) |      |                               | Controls (N = 256)            |       |                               | OR (CI95%)                   | p                                 |                                   |
|---------------------|---------------------|------------------|------------------------|------|-------------------------------|-------------------------------|-------|-------------------------------|------------------------------|-----------------------------------|-----------------------------------|
|                     |                     |                  | N                      | %    | HWE                           | N                             | %     | HWE                           |                              |                                   |                                   |
| <i>PDCD1 (PD-1)</i> | rs36084323 (PD-1.1) | GG               | 229                    | 96.6 | $p = 0.070$ ;<br>$f = -0.017$ | 249                           | 97.3  | $p = 0.824$ ;<br>$f = -0.014$ | 1                            | $\chi^2 = 0.171$ ;<br>$p = 0.679$ |                                   |
|                     |                     | GA               | 8                      | 3.4  |                               | 7                             | 2.7   |                               | 1.23 (0.45; 3.34)            |                                   |                                   |
|                     |                     | AA               | 0                      | 0.0  |                               | 0                             | 0.00  |                               | -                            |                                   |                                   |
|                     | rs11568821 (PD-1.3) | GG               | 188                    |      | $p = 0.075$ ;<br>$f = 0.116$  | 206                           | 80.5  | $p = 0.445$ ;<br>$f = 0.048$  | 1                            | $\chi^2 = 0.592$ ;<br>$p = 0.744$ |                                   |
|                     |                     | GA               | 43                     | 79.3 |                               | 46                            | 18.0  |                               | 1.02 (0.65; 1.62)            |                                   |                                   |
|                     |                     | AA               | 6                      | 2.5  |                               | 4                             | 1.6   |                               | 1.58 (0.47; 5.35)            |                                   |                                   |
|                     | rs2227981 (PD-1.5)  | CC               | 80                     | 33.8 | $p = 0.713$ ;<br>$f = 0.024$  | 82                            | 32.0  | $p = 0.361$ ;<br>$f = -0.057$ | 1                            | $\chi^2 = 0.814$ ;<br>$p = 0.666$ |                                   |
|                     |                     | CT               | 113                    | 47.7 |                               | 132                           | 51.6  |                               | 0.88 (0.59; 1.30)            |                                   |                                   |
|                     |                     | TT               | 44                     | 18.6 |                               | 42                            | 16.4  |                               | 1.07 (0.64; 1.81)            |                                   |                                   |
|                     | rs10204525 (PD-1.6) | GG               | 195                    | 82.3 | $p = 0.454$ ;<br>$f = -0.049$ | 208                           | 81.2  | $p = 0.037$ ;<br>$f = 0.131$  | 1                            | $\chi^2 = 3.275$ ;<br>$p = 0.194$ |                                   |
|                     |                     | GA               | 41                     | 17.3 |                               | 42                            | 16.4  |                               | 1.04 (0.65; 1.47)            |                                   |                                   |
|                     |                     | AA               | 1                      | 1    |                               | 6                             | 2.3   |                               | 0.25 (0.04; 1.47)            |                                   |                                   |
|                     | rs7421861           | TT               | 107                    | 45.1 | $p = 0.072$ ;<br>$f = 0.117$  | 99                            | 38.7  | $p = 0.142$ ;<br>$f = -0.052$ | 1                            | $\chi^2 = 5.325$ ;<br>$p = 0.063$ |                                   |
|                     |                     | TC               | 95                     | 40.1 |                               | 129                           | 50.4  |                               | 0.68 (0.47; 1.00)            |                                   |                                   |
|                     |                     | CC               | 35                     | 14.8 |                               | 28                            | 10.9  |                               | 1.15 (0.66; 2.03)            |                                   |                                   |
|                     | <i>PD-L1</i>        | PD-L1 (rs822335) | CC                     | 84   | 35.9                          | $p = 0.105$ ;<br>$f = -0.106$ | 102   | 40.5                          | $p = 0.429$ ;<br>$f = 0.050$ | 1                                 | $\chi^2 = 3.022$ ;<br>$p = 0.221$ |
|                     |                     |                  | CT                     | 122  | 52.1                          |                               | 112   | 44.4                          |                              | 1.32 (0.90; 1.94)                 |                                   |
|                     |                     |                  | TT                     | 28   | 12.0                          |                               | 38    | 15.1                          |                              | 0.90 (0.51; 1.58)                 |                                   |
| PD-L1 (rs4143815)   |                     | GG               | 107                    | 45.7 | $p = 0.282$ ;<br>$f = 0.070$  | 122                           | 48.41 | $p = 0.455$ ;<br>$f = 0.047$  | 1                            | $\chi^2 = 0.655$ ;<br>$p = 0.721$ |                                   |
|                     |                     | GC               | 97                     | 41.5 |                               | 103                           | 40.88 |                               | 1.07 (0.73; 1.57)            |                                   |                                   |
|                     |                     | CC               | 30                     | 12.8 |                               | 27                            | 10.71 |                               | 1.26 (0.71; 2.25)            |                                   |                                   |
| PD-L1 (rs4742098)   |                     | AA               | 136                    | 58.1 | $p = 0.628$ ;<br>$f = 0.032$  | 137                           | 54.4  | $p = 0.737$ ;<br>$f = -0.021$ | 1                            | $\chi^2 = 0.777$ ;<br>$p = 0.678$ |                                   |
|                     |                     | AG               | 83                     | 35.3 |                               | 99                            | 39.3  |                               | 0.85 (0.58; 1.23)            |                                   |                                   |
|                     |                     | GG               | 15                     | 6.4  |                               | 16                            | 6.3   |                               | 0.95 (0.45; 1.97)            |                                   |                                   |
| PD-L1 (rs10815225)  |                     | GG               | 185                    | 79.1 | $p = 0.941$ ;<br>$f = 0.005$  | 214                           | 84.92 | $p = 0.064$ ;<br>$f = 0.117$  | 1                            | $\chi^2 = 3.389$ ;<br>$p = 0.184$ |                                   |
|                     |                     | GC               | 46                     | 19.7 |                               | 34                            | 13.49 |                               | 1.56 (0.96; 2.52)            |                                   |                                   |
|                     |                     | CC               | 3                      | 1.3  |                               | 4                             | 1.59  |                               | 0.90 (0.22; 3.69)            |                                   |                                   |

**Table S2.** Analysis of linkage disequilibrium ( $r^2$ ) between genetic variants located in *PDCD1* gene.

| <b>Controls</b>       |                   |                  |                   |                  |
|-----------------------|-------------------|------------------|-------------------|------------------|
|                       | <b>rs11568821</b> | <b>rs2227981</b> | <b>rs10204525</b> | <b>rs7421861</b> |
| <b>rs36084323</b>     | 0.001             | 0.010            | 0.118             | 0.000            |
| <b>rs11568821</b>     | –                 | 0.057            | 0.004             | 0.176            |
| <b>rs2227981</b>      | –                 | –                | 0.082             | 0.372            |
| <b>rs10204525</b>     | –                 | –                | –                 | 0.053            |
| <b>ccRCC patients</b> |                   |                  |                   |                  |
|                       | <b>rs11568821</b> | <b>rs2227981</b> | <b>rs10204525</b> | <b>rs7421861</b> |
| <b>rs36084323</b>     | 0.002             | 0.012            | 0.120             | 0.009            |
| <b>rs11568821</b>     | –                 | 0.102            | 0.013             | 0.242            |
| <b>rs2227981</b>      | –                 | –                | 0.064             | 0.343            |
| <b>rs10204525</b>     | –                 | –                | –                 | 0.051            |

**Table S3.** Analysis of linkage disequilibrium ( $r^2$ ) between genetic variants located in *PD-L1* gene.

| <b>Controls</b>       |                  |                  |                   |
|-----------------------|------------------|------------------|-------------------|
|                       | <b>rs4143815</b> | <b>rs4742098</b> | <b>rs10815225</b> |
| <b>rs822335</b>       | 0.006            | 0.000            | 0.054             |
| <b>rs4143815</b>      | –                | 0.537            | 0.019             |
| <b>rs4742098</b>      | –                | –                | 0.064             |
| <b>ccRCC patients</b> |                  |                  |                   |
|                       | <b>rs4143815</b> | <b>rs4742098</b> | <b>rs10815225</b> |
| <b>rs822335</b>       | 0.125            | 0.058            | 0.066             |
| <b>rs4143815</b>      | –                | 0.558            | 0.003             |
| <b>rs4742098</b>      | –                | –                | 0.021             |

**Table S4.** *PDCD1* haplotype analysis in relation to ccRCC risk.

| <i>PDCD1</i> haplotype |           |            |           |            | ccRCC          | Controls     | $\chi^2$                                      | <i>p</i> | OR (CI95%)        |
|------------------------|-----------|------------|-----------|------------|----------------|--------------|-----------------------------------------------|----------|-------------------|
| rs36084323             | rs7421861 | rs11568821 | rs2227981 | rs10204525 | patients N (%) | N (%)        |                                               |          |                   |
| G                      | C         | A          | C         | C          | 48.7 (11.7)    | 51.1 (10.0)  | 0.750                                         | 0.386    | 1.20 (0.79; 1.82) |
| G                      | T         | G          | C         | C          | 89.4 (21.5)    | 106.1 (20.7) | 0.096                                         | 0.757    | 1.05 (0.76; 1.44) |
| G                      | C         | G          | C         | C          | 90.0 (21.6)    | 130.1 (25.4) | 1.749                                         | 0.186    | 0.81 (0.60; 1.11) |
| G                      | T         | G          | T         | C          | 145.3 (34.9)   | 166.2 (32.5) | 0.696                                         | 0.404    | 1.12 (0.85; 1.48) |
| G                      | T         | G          | T         | T          | 28.8 (6.9)     | 43.1 (8.4)   | 0.706                                         | 0.401    | 0.81 (0.50; 1.32) |
| <b>global</b>          |           |            |           |            |                |              | <b><math>\chi^2 = 3.167; p = 0.530</math></b> |          |                   |

Significant results were bolded

**Table S5.** Rs7421861 x rs10815225 interaction - observed and expected genotype distributions in ccRCC patients and control subjects.

| ccRCC patients |           |     |          |          |            |          |          |          |          |              |              |
|----------------|-----------|-----|----------|----------|------------|----------|----------|----------|----------|--------------|--------------|
| Observed       |           |     |          | Expected |            |          |          | $\chi^2$ | <i>p</i> |              |              |
| Genotype       | rs7421861 |     |          | Genotype | rs7421861  |          |          |          |          |              |              |
|                | TT+CC     | TC  | $\Sigma$ |          | TT+CC      | TC       | $\Sigma$ |          |          |              |              |
| rs10815225     | GG        | 92  | 71       | 163      | rs10815225 | GG       | 99.39    | 63.61    | 163.0    | <b>6.873</b> | <b>0.009</b> |
|                | GC+CC     | 33  | 9        | 42       |            | GC       | 25.61    | 16.39    | 42.0     |              |              |
|                | $\Sigma$  | 125 | 80       | 205      |            | $\Sigma$ | 125.0    | 80.0     | 205.0    |              |              |
| Controls       |           |     |          |          |            |          |          |          |          |              |              |
| Observed       |           |     |          | Expected |            |          |          | $\chi^2$ | <i>p</i> |              |              |
| Genotype       | rs7421861 |     |          | Genotype | rs7421861  |          |          |          |          |              |              |
|                | TT+CC     | TC  | $\Sigma$ |          | TT+CC      | TC       | $\Sigma$ |          |          |              |              |
| rs10815225     | GG        | 109 | 105      | 214      | rs10815225 | GG       | 106.15   | 107.85   | 214.0    | 1.006        | 0.316        |
|                | GC+CC     | 16  | 22       | 38       |            | GC+CC    | 18.85    | 19.15    | 38.0     |              |              |
|                | $\Sigma$  | 125 | 127      | 252      |            | $\Sigma$ | 125      | 127      | 252.0    |              |              |

In ccRCC patient group there is a difference between observed and expected number of genotypes ( $p = 0.009$ ), while in controls the observed number of genotypes did not differ from the expected ( $p = 0.316$ ). Significant results were bolded.

**Table S6.** List of Assays used in the study to perform genotyping of examined SNP.

| <b>Gene</b>         | <b>Polymorphism</b> | <b>Assay ID</b> |
|---------------------|---------------------|-----------------|
|                     | rs36084323G>A       | C_57931321_10   |
|                     | rs7421861T>C        | C_26891639_10   |
| <b><i>PDCD1</i></b> | rs11568821G>A       | C_57931290_10   |
|                     | rs2227981C>T        | C_57931286_20   |
|                     | rs10204525G>A       | C__172862_20    |
|                     | rs10815225 G>C      | C__1348557_30   |
| <b><i>PD-L1</i></b> | rs822335 C>T        | C__7590674_10   |
|                     | rs4143815 G>C       | C_31941235_10   |
|                     | rs4742098 A>G       | C_27957750_10   |

A

Query SNP: **rs36084323** and variants with  $r^2 \geq 0.8$

| chr | pos (hg38) | LD (r <sup>2</sup> ) | LD (D') | variant     | Ref    | Alt | AFR freq | AMR freq | ASN freq | EUR freq | SiPhy cons | Promoter histone marks | Enhancer histone marks | DNase        | Proteins bound   | Motifs changed       | NHGRI/EBI GWAS hits | GRASP QTL hits | Selected eQTL hits | GENCODE genes          | dbSNP func annot   |          |
|-----|------------|----------------------|---------|-------------|--------|-----|----------|----------|----------|----------|------------|------------------------|------------------------|--------------|------------------|----------------------|---------------------|----------------|--------------------|------------------------|--------------------|----------|
| 2   | 241812307  | 0.82                 | 1       | rs76182246  | T      | G   | 0.00     | 0.18     | 0.46     | 0.01     |            |                        | 4 tissues              | LNG          |                  | 4 altered motifs     |                     |                |                    | NEU4                   | intronic           |          |
| 2   | 241814177  | 0.82                 | 1       | rs4675992   | C      | G   | 0.00     | 0.18     | 0.48     | 0.01     |            |                        | 8 tissues              |              |                  | 6 altered motifs     |                     |                |                    | NEU4                   | intronic           |          |
| 2   | 241818736  | 0.82                 | 1       | rs2178827   | C      | G   | 0.00     | 0.18     | 0.48     | 0.01     |            | LIV                    | 6 tissues              | LIV          |                  | 9 altered motifs     |                     |                |                    | 1.3kb 3' of NEU4       |                    |          |
| 2   | 241822233  | 0.82                 | 1       | rs75754715  | T      | C   | 0.01     | 0.18     | 0.47     | 0.01     |            |                        | 9 tissues              |              |                  | 9 altered motifs     |                     |                |                    | 5.7kb 3' of NEU4       |                    |          |
| 2   | 241822298  | 0.82                 | 1       | rs80184609  | G      | C   | 0.01     | 0.18     | 0.47     | 0.01     |            |                        | 9 tissues              |              |                  | 7 altered motifs     |                     |                |                    | 5.7kb 3' of NEU4       |                    |          |
| 2   | 241822909  | 0.82                 | 1       | rs18354878  | C      | G   | 0.00     | 0.18     | 0.46     | 0.01     |            | BRST                   | KID, THYM              |              |                  |                      |                     |                |                    | 6.4kb 3' of NEU4       |                    |          |
| 2   | 241830968  | 0.82                 | 1       | rs34931532  | C      | T   | 0.00     | 0.18     | 0.47     | 0.01     |            |                        |                        |              |                  |                      |                     |                | lrf                | 13kb 5' of AC114730.2  |                    |          |
| 2   | 241833979  | 0.82                 | 1       | rs35471993  | A      | G   | 0.01     | 0.18     | 0.47     | 0.01     |            | BLD, BONE              | ESDR, ADRL             |              |                  | ATF3,CTCF,RXR        |                     |                |                    | 10kb 5' of AC114730.2  |                    |          |
| 2   | 241836300  | 0.82                 | 1       | rs76285602  | C      | T   | 0.00     | 0.18     | 0.47     | 0.01     |            |                        |                        |              | CTCF             | 4 altered motifs     |                     |                |                    | 8.1kb 5' of AC114730.2 |                    |          |
| 2   | 241842121  | 0.82                 | 1       | rs4675957   | G      | T   | 0.00     | 0.18     | 0.47     | 0.01     |            |                        | 4 tissues              | IPSC,BLD,BLD |                  |                      |                     |                |                    | 2.3kb 5' of AC114730.2 |                    |          |
| 2   | 241845073  | 0.82                 | 1       | rs77227651  | G      | T   | 0.00     | 0.18     | 0.47     | 0.01     |            | 5 tissues              | 16 tissues             |              |                  | 4 altered motifs     |                     |                |                    | 36bp 3' of AC114730.2  |                    |          |
| 2   | 241845422  | 1                    | 1       | rs76840685  | A      | C   | 0.00     | 0.19     | 0.47     | 0.01     |            | BLD, FAT, MUS          | 12 tissues             | BLD,LNG,BLD  |                  | 4 altered motifs     |                     |                |                    | 385bp 3' of AC114730.2 |                    |          |
| 2   | 241847314  | 1                    | 1       | rs72484064  | G      | A   | 0.00     | 0.19     | 0.47     | 0.01     |            |                        |                        |              |                  | 6 altered motifs     |                     |                |                    | 2.3kb 3' of AC114730.2 |                    |          |
| 2   | 241849417  | 1                    | 1       | rs28699177  | C      | T   | 0.01     | 0.19     | 0.47     | 0.01     |            |                        | 4 tissues              |              |                  |                      |                     |                |                    | 463bp 3' of PDCD1      |                    |          |
| 2   | 241849525  | 1                    | 1       | rs28542728  | G      | A   | 0.00     | 0.19     | 0.47     | 0.01     |            |                        | 5 tissues              |              |                  |                      |                     |                |                    | 355bp 3' of PDCD1      |                    |          |
| 2   | 241851281  | 1                    | 1       | rs2227982   | G      | A   | 0.00     | 0.19     | 0.47     | 0.01     |            |                        | IPSC                   |              |                  |                      |                     |                |                    | PTF1-beta              | PDCD1              | missense |
| 2   | 241852468  | 1                    | 1       | rs34819629  | C      | T   | 0.00     | 0.19     | 0.47     | 0.01     |            |                        | ESDR, IPSC, MUS        |              |                  | ERalpha-a            |                     |                |                    |                        | PDCD1              | intronic |
| 2   | 241855150  | 0.92                 | 1       | rs80186521  | C      | T   | 0.01     | 0.19     | 0.47     | 0.02     |            |                        | 8 tissues              | BLD,HRT,LNG  |                  | 4 altered motifs     |                     |                |                    |                        | PDCD1              | intronic |
| 2   | 241857110  | 1                    | 1       | rs41509544  | G      | A   | 0.13     | 0.20     | 0.48     | 0.01     |            | BLD, GI                | 5 tissues              | BLD,LIV      |                  |                      |                     |                |                    |                        | PDCD1              | intronic |
| 2   | 241857532  | 1                    | 1       | rs202017368 | T      | TC  | 0.01     | 0.19     | 0.49     | 0.01     |            | 4 tissues              | BLD, SKIN, SPLN        |              |                  | 4 altered motifs     |                     |                |                    |                        | PDCD1              | intronic |
| 2   | 241857537  | 1                    | 1       | rs142194983 | C      | CA  | 0.01     | 0.19     | 0.49     | 0.01     |            | 4 tissues              | BLD, SKIN, SPLN        |              |                  | 5 altered motifs     |                     |                |                    |                        | PDCD1              | intronic |
| 2   | 241857786  | 1                    | 1       | rs75565781  | G      | C   | 0.01     | 0.19     | 0.49     | 0.01     |            | 4 tissues              | SKIN, SPLN             |              |                  | ERalpha-a,Rad21,SIX5 |                     |                |                    |                        | PDCD1              | intronic |
| 2   | 241857939  | 0.91                 | 1       | rs143627472 | 19-mer | T   | 0.05     | 0.18     | 0.46     | 0.01     |            | 4 tissues              | 4 tissues              |              |                  | 6 altered motifs     |                     |                |                    |                        | PDCD1              | intronic |
| 2   | 241857978  | 0.91                 | 1       | rs74000562  | C      | T   | 0.07     | 0.17     | 0.45     | 0.01     |            | 4 tissues              | 4 tissues              |              |                  | 4 altered motifs     |                     |                |                    |                        | PDCD1              | intronic |
| 2   | 241857996  | 0.82                 | 0.91    | rs74000563  | T      | G   | 0.06     | 0.18     | 0.45     | 0.01     |            | 4 tissues              | 4 tissues              |              |                  | Foxa,GR              |                     |                |                    |                        | PDCD1              | intronic |
| 2   | 241858014  | 0.91                 | 1       | rs74000564  | T      | C   | 0.04     | 0.18     | 0.45     | 0.01     |            | 4 tissues              | 4 tissues              |              |                  | 9 altered motifs     |                     |                |                    |                        | PDCD1              | intronic |
| 2   | 241858082  | 1                    | 1       | rs74000565  | C      | T   | 0.04     | 0.19     | 0.49     | 0.01     |            | 4 tissues              | BLD, SPLN, LIV         | BLD          |                  | CACD,SP1,SRF         |                     |                |                    |                        | PDCD1              | intronic |
| 2   | 241858748  | 1                    | 1       | rs35933396  | G      | A   | 0.04     | 0.19     | 0.49     | 0.01     |            | 5 tissues              | 11 tissues             | 4 tissues    | 4 bound proteins | NF-E2,Pou2f2         |                     |                |                    |                        | PDCD1              | intronic |
| 2   | 241859444  | 1                    | 1       | rs36084323  | C      | T   | 0.04     | 0.19     | 0.48     | 0.01     |            | 5 tissues              | 16 tissues             | MUS,THYM,BLD | CTCF,HSF1        | 4 altered motifs     |                     |                |                    |                        | 535bp 5' of PDCD1  |          |
| 2   | 241860237  | 1                    | 1       | rs41360545  | T      | C   | 0.04     | 0.19     | 0.49     | 0.01     |            | 9 tissues              | 14 tissues             | 6 tissues    | CTCF,EBF1        | 8 altered motifs     |                     |                |                    |                        | 1.3kb 5' of PDCD1  |          |
| 2   | 241860758  | 0.84                 | 1       | rs28394424  | A      | G   | 0.02     | 0.19     | 0.49     | 0.02     |            | BLD, MUS               | 14 tissues             |              |                  | 6 altered motifs     |                     |                |                    |                        | 1.8kb 5' of PDCD1  |          |
| 2   | 241865936  | 0.84                 | 1       | rs199959525 | TGTG   | T   | 0.00     | 0.17     | 0.48     | 0.02     |            | 4 tissues              | 8 tissues              | 7 tissues    | TR4,CMYC         | Ets,Pax-4,RREB-1     |                     |                |                    |                        | 3.7kb 5' of CXXC11 |          |
| 2   | 241866923  | 0.84                 | 1       | rs75247106  | C      | T   | 0.00     | 0.19     | 0.49     | 0.02     |            | THYM                   | 9 tissues              | 6 tissues    |                  | AP-2,SP1             |                     |                |                    |                        | 2.7kb 5' of CXXC11 |          |
| 2   | 241867868  | 0.84                 | 1       | rs80336268  | G      | A   | 0.00     | 0.19     | 0.48     | 0.02     |            | BLD, THYM, SPLN        | 6 tissues              |              |                  | BCL_Pax-5,Spz1       |                     |                |                    |                        | 1.7kb 5' of CXXC11 |          |
| 2   | 241868458  | 0.84                 | 1       | rs78051760  | C      | T   | 0.00     | 0.19     | 0.49     | 0.02     |            | BLD, THYM              | 13 tissues             | 4 tissues    |                  | Znf143               |                     |                |                    |                        | 1.1kb 5' of CXXC11 |          |
| 2   | 241868480  | 1                    | 1       | rs77635907  | A      | G   | 0.00     | 0.19     | 0.49     | 0.01     |            | BLD, THYM              | 13 tissues             | 4 tissues    |                  | 7 altered motifs     |                     |                |                    |                        | 1.1kb 5' of CXXC11 |          |
| 2   | 241868548  | 0.84                 | 1       | rs79851648  | C      | T   | 0.00     | 0.19     | 0.49     | 0.02     |            | BLD, THYM              | 13 tissues             | 4 tissues    |                  | CEBPB,Hsf,STAT       |                     |                |                    |                        | 1.1kb 5' of CXXC11 |          |
| 2   | 241869143  | 0.84                 | 1       | rs6742353   | T      | C   | 0.08     | 0.19     | 0.49     | 0.02     |            |                        | 7 tissues              |              |                  | Pax-4                |                     |                |                    |                        | 456bp 5' of CXXC11 | intronic |
| 2   | 241869518  | 0.84                 | 1       | rs28486065  | C      | G   | 0.00     | 0.19     | 0.49     | 0.02     |            | BRN                    | 6 tissues              | BLD          |                  | 11 altered motifs    |                     |                |                    |                        | 81bp 5' of CXXC11  | intronic |
| 2   | 241869714  | 0.84                 | 1       | rs75506522  | G      | C   | 0.01     | 0.18     | 0.49     | 0.02     |            | BRN                    | 7 tissues              | BRN          |                  | 21 altered motifs    |                     |                |                    |                        | CXXC11             | intronic |
| 2   | 241875612  | 0.84                 | 1       | rs28564919  | C      | T   | 0.17     | 0.20     | 0.48     | 0.02     |            |                        | BLD                    |              |                  |                      |                     |                |                    |                        | 1.8kb 3' of CXXC11 |          |

B



Query SNP: **rs11568821** and variants with  $r^2 \geq 0.8$

| chr | pos (hg38) | LD (r <sup>2</sup> ) | LD (D') | variant     | Ref    | Alt | AFR freq | AMR freq | ASN freq | EUR freq | SiPhy cons | Promoter histone marks | Enhancer histone marks | DNase     | Proteins bound | Motifs changed    | NHGRI/EBI GWAS hits | GRASP QTL hits | Selected eQTL hits | GENCODE genes          | dbSNP func annot |
|-----|------------|----------------------|---------|-------------|--------|-----|----------|----------|----------|----------|------------|------------------------|------------------------|-----------|----------------|-------------------|---------------------|----------------|--------------------|------------------------|------------------|
| 2   | 241824526  | 0.85                 | 0.95    | rs200789545 | 7-mer  | A   | 0.18     | 0.07     | 0.00     | 0.10     |            |                        | BLD                    |           |                | 5 altered motifs  |                     |                | 8 hits             | 8kb 3' of NEU4         |                  |
| 2   | 241824537  | 0.85                 | 0.95    | rs202244286 | TTCTTC | T   | 0.18     | 0.07     | 0.00     | 0.10     |            |                        | BLD                    |           |                | lrf,TATA,p300     |                     |                | 8 hits             | 8kb 3' of NEU4         |                  |
| 2   | 241833477  | 0.9                  | 0.97    | rs74898709  | G      | A   | 0.16     | 0.07     | 0.00     | 0.10     |            | STRM, BLD              | 8 tissues              | 8 tissues | CFOS           | CEBPB,Egr-1,Gmeb1 |                     |                | 9 hits             | 11kb 5' of AC114730.2  |                  |
| 2   | 241839789  | 0.94                 | 0.97    | rs79388822  | T      | C   | 0.01     | 0.06     | 0.00     | 0.10     |            |                        |                        |           |                | Homez,Mef2,Zfp105 |                     |                | 10 hits            | 4.6kb 5' of AC114730.2 |                  |
| 2   | 241842504  | 0.97                 | 0.99    | rs111233827 | G      | A   | 0.01     | 0.06     | 0.00     | 0.10     |            |                        | 5 tissues              |           |                |                   |                     |                | 10 hits            | 1.9kb 5' of AC114730.2 |                  |
| 2   | 241851760  | 1                    | 1       | rs11568821  | C      | T   | 0.01     | 0.06     | 0.00     | 0.10     |            |                        | ESDR, IPSC             |           |                | 7 altered motifs  |                     |                | 10 hits            | PDCD1                  | intronic         |
| 2   | 241864233  | 0.89                 | 0.96    | rs76768583  | T      | C   | 0.01     | 0.06     | 0.00     | 0.10     |            | BLD, STRM              | 8 tissues              | BLD       |                | 8 altered motifs  |                     |                | 9 hits             | 5.3kb 5' of PDCD1      |                  |
| 2   | 241875344  | 0.85                 | 0.96    | rs77803400  | A      | G   | 0.02     | 0.10     | 0.06     | 0.11     |            |                        | BLD                    |           |                | lrf,p300          |                     |                | 9 hits             | 1.5kb 3' of CXXC11     |                  |

C

Query SNP: **rs2227981** and variants with  $r^2 \geq 0.8$

| chr | pos (hg38) | LD (r <sup>2</sup> ) | LD (D') | variant    | Ref   | Alt | AFR freq | AMR freq | ASN freq | EUR freq | SiPhy cons | Promoter histone marks | Enhancer histone marks | DNase      | Proteins bound   | Motifs changed      | NHGRI/EBI GWAS hits | GRASP QTL hits | Selected eQTL hits | GENCODE genes          | dbSNP func annot |
|-----|------------|----------------------|---------|------------|-------|-----|----------|----------|----------|----------|------------|------------------------|------------------------|------------|------------------|---------------------|---------------------|----------------|--------------------|------------------------|------------------|
| 2   | 241835521  | 0.94                 | 0.97    | rs4571087  | G     | C   | 0.61     | 0.63     | 0.74     | 0.60     |            |                        | BLD                    |            |                  | AP-1                |                     |                | 16 hits            | 8.9kb 5' of AC114730.2 |                  |
| 2   | 241845788  | 0.96                 | -0.98   | rs71052612 | CGGTG | C   | 0.57     | 0.36     | 0.29     | 0.40     |            | 3 tissues              | 13 tissues             | BLD, BLD   | EGR1             | 25 altered motifs   |                     |                | 1 hit              | 400bp 5' of AC114730.2 |                  |
| 2   | 241846001  | 0.99                 | 1       | rs4596012  | C     | T   | 0.54     | 0.62     | 0.70     | 0.60     |            |                        | 5 tissues              |            |                  | Egr-1,Znf143        |                     |                | 14 hits            | 751bp 3' of AC114730.2 |                  |
| 2   | 241846137  | 0.91                 | 0.99    | rs7421578  | G     | A   | 0.49     | 0.61     | 0.69     | 0.58     |            |                        | 5 tissues              |            |                  | 4 altered motifs    |                     |                | 15 hits            | 964bp 3' of AC114730.2 |                  |
| 2   | 241846137  | 0.99                 | 1       | rs7421562  | G     | T   | 0.54     | 0.62     | 0.70     | 0.60     |            |                        | 5 tissues              |            |                  | 4 altered motifs    |                     |                | 14 hits            | 1.1kb 3' of AC114730.2 |                  |
| 2   | 241849406  | 1                    | 1       | rs7568402  | A     | G   | 0.56     | 0.62     | 0.72     | 0.60     |            |                        | 4 tissues              |            |                  | 6 altered motifs    |                     |                | 14 hits            | 474bp 3' of PDCD1      |                  |
| 2   | 241851121  | 1                    | 1       | rs2227981  | A     | G   | 0.54     | 0.62     | 0.72     | 0.60     |            |                        | ESDR, IPSC, LIV        |            |                  | 5 altered motifs    |                     |                | 14 hits            | PDCD1                  | synonymous       |
| 2   | 241851407  | 1                    | 1       | rs6705853  | T     | C   | 0.53     | 0.62     | 0.72     | 0.60     |            |                        | IPSC                   |            |                  | ZBTB7A              |                     |                | 15 hits            | PDCD1                  | intronic         |
| 2   | 241854422  | 0.96                 | 1       | rs7419870  | G     | A   | 0.54     | 0.61     | 0.72     | 0.59     |            |                        | 10 tissues             |            |                  | 4 altered motifs    |                     |                | 15 hits            | PDCD1                  | intronic         |
| 2   | 241854508  | 0.98                 | 1       | rs6605258  | A     | G   | 0.81     | 0.66     | 0.72     | 0.60     |            |                        | 10 tissues             |            |                  | 8 altered motifs    |                     |                | 15 hits            | PDCD1                  | intronic         |
| 2   | 241855866  | 0.86                 | 0.98    | rs6710479  | T     | C   | 0.36     | 0.42     | 0.24     | 0.57     |            | BLD                    | 4 tissues              |            |                  | RREB-1,SP1          |                     |                | 12 hits            | PDCD1                  | intronic         |
| 2   | 241856465  | 0.92                 | 0.98    | rs6758577  | G     | T   | 0.48     | 0.61     | 0.73     | 0.59     |            | BLD                    | BLD, FAT               |            |                  | 7 altered motifs    |                     |                | 14 hits            | PDCD1                  | intronic         |
| 2   | 241856491  | 0.9                  | 0.98    | rs6747063  | C     | G   | 0.40     | 0.60     | 0.73     | 0.59     |            | BLD                    | BLD, FAT               | SKIN       |                  | Mef2,Pou2f2         |                     |                | 12 hits            | PDCD1                  | intronic         |
| 2   | 241857486  | 0.87                 | 0.96    | rs13023138 | G     | C   | 0.49     | 0.45     | 0.24     | 0.58     |            | 4 tissues              | BLD, SKIN, SPLN        |            |                  | 11 altered motifs   |                     |                | 10 hits            | PDCD1                  | intronic         |
| 2   | 241878871  | 0.81                 | 0.92    | rs6605263  | C     | T   | 0.62     | 0.68     | 0.79     | 0.61     |            |                        | MUS                    | MUS, GI    |                  | 5 altered motifs    |                     |                | 9 hits             | 2.5kb 5' of AC131097.3 |                  |
| 2   | 241880721  | 0.83                 | 0.94    | rs12998656 | T     | C   | 0.62     | 0.69     | 0.79     | 0.61     |            | BLD                    | 12 tissues             | BLD        |                  | INSM1               |                     |                | 11 hits            | 641bp 5' of AC131097.3 |                  |
| 2   | 241880865  | 0.82                 | 0.93    | rs28670476 | T     | C   | 0.62     | 0.69     | 0.79     | 0.61     |            | 13 tissues             | 15 tissues             | BLD        |                  | 7 altered motifs    |                     |                | 12 hits            | 497bp 5' of AC131097.3 |                  |
| 2   | 241882321  | 0.83                 | 0.94    | rs6605265  | G     | A   | 0.65     | 0.68     | 0.79     | 0.61     |            | 21 tissues             | 12 tissues             | 20 tissues | 5 bound proteins | Mrg1;Hoxa9,Pbx3,TR4 |                     |                | 14 hits            | AC131097.3             |                  |
| 2   | 241882326  | 0.83                 | 0.94    | rs6605266  | C     | G   | 0.65     | 0.68     | 0.79     | 0.61     |            | 21 tissues             | 12 tissues             | 21 tissues | 4 bound proteins | Mrg1;Hoxa9          |                     |                | 14 hits            | AC131097.3             |                  |
| 2   | 241882823  | 0.83                 | 0.94    | rs6605267  | A     | G   | 0.68     | 0.69     | 0.79     | 0.61     |            | 14 tissues             | 17 tissues             |            |                  | Ik-1,SRF            |                     |                | 16 hits            | AC131097.3             |                  |
| 2   | 241885406  | 0.83                 | 0.94    | rs6605269  | T     | C   | 0.69     | 0.69     | 0.79     | 0.62     |            | PANC                   | 10 tissues             | PANC       |                  | 13 altered motifs   |                     |                | 16 hits            | AC131097.3             |                  |
| 2   | 241885437  | 0.83                 | 0.94    | rs6605270  | T     | C   | 0.69     | 0.69     | 0.79     | 0.62     |            | PANC                   | 10 tissues             |            |                  | NFE-2               |                     |                | 16 hits            | AC131097.3             |                  |
| 2   | 241885676  | 0.83                 | 0.94    | rs6732041  | T     | C   | 0.69     | 0.69     | 0.79     | 0.62     |            | 4 tissues              | 10 tissues             | 5 tissues  |                  | AhR;Arnt,Arnt,GR    |                     |                | 16 hits            | AC131097.3             |                  |

D

Query SNP: **rs10204525** and variants with  $r^2 \geq 0.8$

| chr | pos (hg38) | LD (r <sup>2</sup> ) | LD (D') | variant    | Ref | Alt | AFR freq | AMR freq | ASN freq | EUR freq | SiPhy cons | Promoter histone marks | Enhancer histone marks | DNase     | Proteins bound | Motifs changed        | NHGRI/EBI GWAS hits | GRASP QTL hits | Selected eQTL hits | GENCODE genes          | dbSNP func annot |
|-----|------------|----------------------|---------|------------|-----|-----|----------|----------|----------|----------|------------|------------------------|------------------------|-----------|----------------|-----------------------|---------------------|----------------|--------------------|------------------------|------------------|
| 2   | 241840582  | 0.81                 | 0.97    | rs79245503 | C   | T   | 0.17     | 0.15     | 0.23     | 0.11     |            |                        | BLD                    |           |                | 5 altered motifs      |                     |                | 1 hit              | 3.8kb 5' of AC114730.2 |                  |
| 2   | 241846376  | 0.8                  | 0.97    | rs11495865 | G   | A   | 0.03     | 0.07     | 0.15     | 0.11     |            |                        | 5 tissues              |           |                | 5 altered motifs      |                     |                | 3 hits             | 1.3kb 3' of AC114730.2 |                  |
| 2   | 241848419  | 0.8                  | 0.93    | rs4973659  | G   | A   | 0.16     | 0.15     | 0.24     | 0.11     |            |                        |                        |           |                | Pbx3,p300             |                     |                | 2 hits             | 1.5kb 3' of PDCD1      |                  |
| 2   | 241850169  | 1                    | 1       | rs10204525 | C   | T   | 0.39     | 0.35     | 0.70     | 0.12     |            |                        |                        |           |                | 5 altered motifs      |                     |                | 2 hits             | PDCD1                  | 3'-UTR           |
| 2   | 241851697  | 0.82                 | 0.99    | rs41386349 | G   | A   | 0.17     | 0.15     | 0.23     | 0.11     |            |                        | ESDR, IPSC             |           |                | 4 altered motifs      |                     |                | 3 hits             | PDCD1                  | intronic         |
| 2   | 241853775  | 0.86                 | 1       | rs79620053 | C   | T   | 0.14     | 0.14     | 0.23     | 0.11     |            |                        | 7 tissues              |           |                | MIF-1,Zfx             |                     |                | 3 hits             | PDCD1                  | intronic         |
| 2   | 241866859  | 0.83                 | 0.94    | rs80154873 | T   | C   | 0.25     | 0.29     | 0.64     | 0.12     |            | THYM                   | 9 tissues              | 6 tissues |                | PU.1,STAT             |                     |                | 2 hits             | 2.7kb 5' of CXXC11     |                  |
| 2   | 241867263  | 0.86                 | 0.94    | rs4072221  | A   | G   | 0.43     | 0.30     | 0.64     | 0.12     |            | BLD, THYM              | 7 tissues              | THYM      |                | GATA,Hoxa7,TAL1       |                     |                | 1 hit              | 2.3kb 5' of CXXC11     |                  |
| 2   | 241868028  | 0.83                 | 0.92    | rs78574057 | G   | A   | 0.23     | 0.29     | 0.62     | 0.12     |            | BLD, THYM, SPLN        | 6 tissues              | THYM,LIV  |                | CTCF,MOVO-B,Nanog     |                     |                | 2 hits             | 1.6kb 5' of CXXC11     |                  |
| 2   | 241869928  | 0.87                 | 0.95    | rs4973697  | T   | C   | 0.24     | 0.28     | 0.63     | 0.12     |            | SKIN, ERN              | 5 tissues              |           |                | 7 altered motifs      |                     |                | 2 hits             | CXXC11                 | intronic         |
| 2   | 241871050  | 0.84                 | 0.95    | rs28512331 | G   | A   | 0.11     | 0.27     | 0.63     | 0.12     |            | THYM                   | 9 tissues              | 4 tissues |                | BCL,NRSF              |                     |                | 4 hits             | CXXC11                 | intronic         |
| 2   | 241871053  | 0.83                 | 0.94    | rs28380696 | A   | G   | 0.41     | 0.30     | 0.63     | 0.12     |            | THYM                   | 9 tissues              | 4 tissues |                | Sin3AK-20             |                     |                | 2 hits             | CXXC11                 | intronic         |
| 2   | 241871147  | 0.83                 | 0.91    | rs28682292 | T   | C   | 0.44     | 0.33     | 0.68     | 0.12     |            | THYM                   | 9 tissues              | 6 tissues |                | ERalpha-a,Pax-2,SEF-1 |                     |                | 2 hits             | CXXC11                 | intronic         |
| 2   | 241872131  | 0.88                 | 0.96    | rs28499542 | C   | T   | 0.23     | 0.28     | 0.63     | 0.12     |            | 7 tissues              |                        |           |                | 4 altered motifs      |                     |                | 3 hits             | CXXC11                 | synonymous       |
| 2   | 241872208  | 0.88                 | 0.96    | rs28378061 | T   | C   | 0.23     | 0.28     | 0.63     | 0.12     |            | 7 tissues              |                        |           |                | 7 altered motifs      |                     |                | 3 hits             | CXXC11                 | missense         |
| 2   | 241872311  | 0.87                 | 0.95    | rs28523279 | A   | T   | 0.34     | 0.29     | 0.63     | 0.12     |            | 6 tissues              | BLD                    |           |                |                       |                     |                | 2 hits             | CXXC11                 | synonymous       |
| 2   | 241874009  | 0.88                 | 0.96    | rs28620415 | G   | A   | 0.23     | 0.28     | 0.63     | 0.12     |            | BLD, SKIN              |                        |           |                | Pax-6,ZID             |                     |                | 3 hits             | 185bp 3' of CXXC11     |                  |
| 2   | 241876432  | 0.87                 | 0.96    | rs28663478 | T   | C   | 0.34     | 0.29     | 0.61     | 0.12     |            | IPSC, BLD, MUS         | BLD, BLD, OVRY         | CTCF      |                | PLAG1                 |                     |                | 3 hits             | 2.6kb 3' of CXXC11     |                  |
| 2   | 241876445  | 0.87                 | 0.96    | rs28441154 | A   | G   | 0.34     | 0.29     | 0.62     | 0.12     |            | IPSC, BLD, MUS         | BLD, BLD, OVRY         |           |                |                       |                     |                | 3 hits             | 2.6kb 3' of CXXC11     |                  |

E

Query SNP: **rs7421861** and variants with  $r^2 \geq 0.8$

| chr | pos (hg38) | LD (r <sup>2</sup> ) | LD (D') | variant     | Ref | Alt | AFR freq | AMR freq | ASN freq | EUR freq | SiPhy cons | Promoter histone marks | Enhancer histone marks | DNase | Proteins bound | Motifs changed    | NHGRI/EBI GWAS hits | GRASP QTL hits | Selected eQTL hits | GENCODE genes          | dbSNP func annot |
|-----|------------|----------------------|---------|-------------|-----|-----|----------|----------|----------|----------|------------|------------------------|------------------------|-------|----------------|-------------------|---------------------|----------------|--------------------|------------------------|------------------|
| 2   | 241841903  | 0.95                 | 0.98    | rs78707837  | G   | A   | 0.08     | 0.24     | 0.13     | 0.35     |            |                        | 4 tissues              | MUS   |                | HNF4,Spz1         |                     |                | 6 hits             | 2.5kb 5' of AC114730.2 |                  |
| 2   | 241845175  | 0.98                 | -0.99   | rs62193128  | C   | T   | 0.92     | 0.76     | 0.87     | 0.65     |            | 5 tissues              | 16 tissues             | KID   |                | Smad3,Smad        |                     |                | 4 hits             | 138bp 3' of AC114730.2 |                  |
| 2   | 241849586  | 0.86                 | 1       | rs28570544  | C   | T   | 0.20     | 0.20     | 0.13     | 0.31     |            |                        | 5 tissues              |       |                | 15 altered motifs |                     |                | 7 hits             | 294bp 3' of PDCD1      |                  |
| 2   | 241853160  | 1                    | 1       | rs7419333   | C   | G   | 0.21     | 0.24     | 0.12     | 0.34     |            |                        | IPSC, SKIN, MUS        |       |                | GATA,PU.1,Zbtb3   |                     |                | 6 hits             | PDCD1                  | intronic         |
| 2   | 241853198  | 1                    | 1       | rs7421861   | A   | G   | 0.21     | 0.24     | 0.12     | 0.34     |            |                        | IPSC, SKIN, MUS        |       |                | 9 altered motifs  |                     |                | 8 hits             | PDCD1                  | intronic         |
| 2   | 241853266  | 0.98                 | 1       | rs5839829   | GT  | G   | 0.13     | 0.23     | 0.12     | 0.34     |            |                        | 4 tissues              |       |                | 4 altered motifs  |                     |                | 6 hits             | PDCD1                  | intronic         |
| 2   | 241853521  | 0.99                 | 1       | rs7420347   | G   | C   | 0.08     | 0.23     | 0.12     | 0.34     |            |                        | 4 tissues              |       |                | 10 altered motifs |                     |                | 7 hits             | PDCD1                  | intronic         |
| 2   | 241854421  | 0.85                 | 0.96    | rs201546955 | C   | CA  | 0.21     | 0.27     | 0.15     | 0.32     |            |                        | 10 tissues             |       |                | 5 altered motifs  |                     |                | 4 hits             | PDCD1                  | intronic         |
| 2   | 241854424  | 0.98                 | 1       | rs41414844  | C   | G   | 0.20     | 0.24     | 0.12     | 0.34     |            |                        | 10 tissues             |       |                | 4 altered motifs  |                     |                | 7 hits             | PDCD1                  | intronic         |

**Figure S1.** Linkage disequilibrium (LD) blocks generated with application of HaploReg v4.1 presenting SNPs being in strong LD ( $r^2 > 0.8$ ) with A) rs36084323G>A (PD-1.1). B) rs11568821G>A (PD-1.3). C) rs2227981C>T (PD-1.5). D) rs10204525G>A (PD-1.6). E) rs7421861T>C.

Query SNP: **rs822335** and variants with  $r^2 \geq 0.8$

| chr | pos (hg38) | LD (r <sup>2</sup> ) | LD (D') | variant         | Ref | Alt | AFR freq | AMR freq | ASN freq | EUR freq | SiPhy cons | Promoter histone marks | Enhancer histone marks | DNAse     | Proteins bound | Motifs changed   | NHGRI/EBI GWAS hits | GRASP QTL hits | Selected eQTL hits | GENCODE genes     | dbSNP func annot |
|-----|------------|----------------------|---------|-----------------|-----|-----|----------|----------|----------|----------|------------|------------------------|------------------------|-----------|----------------|------------------|---------------------|----------------|--------------------|-------------------|------------------|
| 9   | 5448218    | 1                    | 1       | <b>rs822335</b> | T   | C   | 0.62     | 0.56     | 0.36     | 0.63     |            | BLD                    | 7 tissues              | 8 tissues |                | 6 altered motifs |                     |                | 2 hits             | 2.3kb 5' of CD274 |                  |
| 9   | 5449154    | 1                    | 1       | <b>rs822337</b> | T   | A   | 0.49     | 0.54     | 0.36     | 0.63     |            | BLD                    | 7 tissues              | BLD,BLD   |                |                  |                     |                | 2 hits             | 1.3kb 5' of CD274 |                  |

Query SNP: **rs4143815** and variants with  $r^2 \geq 0.8$

| chr | pos (hg38) | LD (r <sup>2</sup> ) | LD (D') | variant          | Ref | Alt | AFR freq | AMR freq | ASN freq | EUR freq | SiPhy cons | Promoter histone marks | Enhancer histone marks | DNAse | Proteins bound | Motifs changed   | NHGRI/EBI GWAS hits | GRASP QTL hits | Selected eQTL hits | GENCODE genes | dbSNP func annot |
|-----|------------|----------------------|---------|------------------|-----|-----|----------|----------|----------|----------|------------|------------------------|------------------------|-------|----------------|------------------|---------------------|----------------|--------------------|---------------|------------------|
| 9   | 5468257    | 1                    | 1       | <b>rs4143815</b> | G   | C   | 0.02     | 0.39     | 0.57     | 0.33     |            |                        |                        | BLD   |                | 7 altered motifs |                     |                |                    | CD274         | 3'-UTR           |

Query SNP: **rs4742098** and variants with  $r^2 \geq 0.8$

| chr | pos (hg38) | LD (r <sup>2</sup> ) | LD (D') | variant            | Ref | Alt | AFR freq | AMR freq | ASN freq | EUR freq | SiPhy cons | Promoter histone marks | Enhancer histone marks | DNAse | Proteins bound | Motifs changed    | NHGRI/EBI GWAS hits | GRASP QTL hits | Selected eQTL hits | GENCODE genes     | dbSNP func annot |
|-----|------------|----------------------|---------|--------------------|-----|-----|----------|----------|----------|----------|------------|------------------------|------------------------|-------|----------------|-------------------|---------------------|----------------|--------------------|-------------------|------------------|
| 9   | 5470497    | 1                    | 1       | <b>rs4742098</b>   | A   | G   | 0.13     | 0.36     | 0.53     | 0.29     |            |                        |                        |       |                | Pbx3              |                     |                |                    | CD274             | 3'-UTR           |
| 9   | 5470813    | 0.89                 | 1       | <b>rs4742099</b>   | G   | A   | 0.04     | 0.34     | 0.53     | 0.27     |            | BLD, MUS               |                        |       |                | EWSR1-FL1         |                     |                |                    | 246bp 3' of CD274 |                  |
| 9   | 5470954    | 0.89                 | 1       | <b>rs4742100</b>   | A   | C   | 0.19     | 0.35     | 0.53     | 0.27     |            | BLD, MUS               | BLD,SKIN               |       |                |                   |                     |                |                    | 387bp 3' of CD274 |                  |
| 9   | 5471271    | 0.89                 | 1       | <b>rs58817806</b>  | A   | G   | 0.04     | 0.34     | 0.53     | 0.27     |            | BLD                    |                        |       |                | 6 altered motifs  |                     |                |                    | 704bp 3' of CD274 |                  |
| 9   | 5472379    | 0.84                 | 1       | <b>rs10815228</b>  | T   | C   | 0.06     | 0.35     | 0.51     | 0.26     |            |                        |                        |       |                |                   |                     | 1 hit          | 1.8kb 3' of CD274  |                   |                  |
| 9   | 5473050    | 0.88                 | 1       | <b>rs148602745</b> | C   | T   | 0.03     | 0.34     | 0.53     | 0.27     |            |                        |                        |       |                | 7 altered motifs  |                     |                |                    | 2.5kb 3' of CD274 |                  |
| 9   | 5474598    | 0.89                 | 1       | <b>rs140533307</b> | G   | A   | 0.15     | 0.35     | 0.53     | 0.27     |            |                        |                        |       |                | 15 altered motifs |                     |                |                    | 4kb 3' of CD274   |                  |
| 9   | 5475754    | 0.89                 | 1       | <b>rs10121574</b>  | G   | A   | 0.14     | 0.35     | 0.53     | 0.27     |            |                        | BLD,BRN                |       |                | 20 altered motifs |                     |                |                    | 5.2kb 3' of CD274 |                  |
| 9   | 5477211    | 0.88                 | 1       | <b>rs10975129</b>  | C   | A   | 0.03     | 0.34     | 0.53     | 0.27     |            |                        |                        |       |                | 4 altered motifs  |                     |                |                    | 6.6kb 3' of CD274 |                  |
| 9   | 5477324    | 0.88                 | 1       | <b>rs62560216</b>  | C   | T   | 0.03     | 0.34     | 0.52     | 0.27     |            |                        |                        |       |                | Pax-6             |                     |                |                    | 6.8kb 3' of CD274 |                  |
| 9   | 5477766    | 0.88                 | 0.99    | <b>rs12685848</b>  | G   | A   | 0.04     | 0.34     | 0.53     | 0.27     |            |                        |                        |       |                | 5 altered motifs  |                     |                |                    | 7.2kb 3' of CD274 |                  |
| 9   | 5478044    | 0.89                 | 1       | <b>rs4742102</b>   | A   | G   | 0.04     | 0.34     | 0.53     | 0.27     |            | BLD                    |                        |       |                | 7 altered motifs  |                     |                |                    | 7.5kb 3' of CD274 |                  |
| 9   | 5479640    | 0.89                 | 1       | <b>rs10815230</b>  | T   | G   | 0.22     | 0.36     | 0.52     | 0.27     |            |                        |                        |       |                | GATA              |                     |                |                    | 9.1kb 3' of CD274 |                  |
| 9   | 5479822    | 0.89                 | 1       | <b>rs7043593</b>   | A   | G   | 0.22     | 0.37     | 0.53     | 0.27     |            | BLD                    |                        |       |                |                   |                     |                |                    | 9.3kb 3' of CD274 |                  |
| 9   | 5480872    | 0.89                 | 1       | <b>rs10815232</b>  | A   | T   | 0.15     | 0.36     | 0.52     | 0.27     |            |                        | BLD                    |       |                | CEBPB,Cdc5        |                     |                | 1 hit              | 10kb 3' of CD274  |                  |

Query SNP: **rs10815225** and variants with  $r^2 \geq 0.8$

| chr | pos (hg38) | LD (r <sup>2</sup> ) | LD (D') | variant           | Ref | Alt | AFR freq | AMR freq | ASN freq | EUR freq | SiPhy cons | Promoter histone marks | Enhancer histone marks | DNAse      | Proteins bound    | Motifs changed    | NHGRI/EBI GWAS hits | GRASP QTL hits | Selected eQTL hits | GENCODE genes     | dbSNP func annot |
|-----|------------|----------------------|---------|-------------------|-----|-----|----------|----------|----------|----------|------------|------------------------|------------------------|------------|-------------------|-------------------|---------------------|----------------|--------------------|-------------------|------------------|
| 9   | 5446078    | 0.89                 | 0.95    | <b>rs10975121</b> | A   | G   | 0.22     | 0.07     | 0.08     | 0.12     |            |                        |                        | 7 tissues  | PU1               | 10 altered motifs |                     | 1 hit          |                    | 4.4kb 5' of CD274 |                  |
| 9   | 5450497    | 1                    | 1       | <b>rs10815225</b> | G   | C   | 0.25     | 0.08     | 0.08     | 0.12     |            |                        |                        | 52 tissues | 32 bound proteins | 12 altered motifs |                     |                |                    | 5bp 5' of CD274   |                  |

**Figure S2.** Linkage disequilibrium (LD) blocks generated with application of HaploReg v4.1 presenting SNPs being in strong LD ( $r^2 > 0.8$ ) with rs822335C>T. rs4143815G>C. rs4742098A>G. rs10815225G>C.

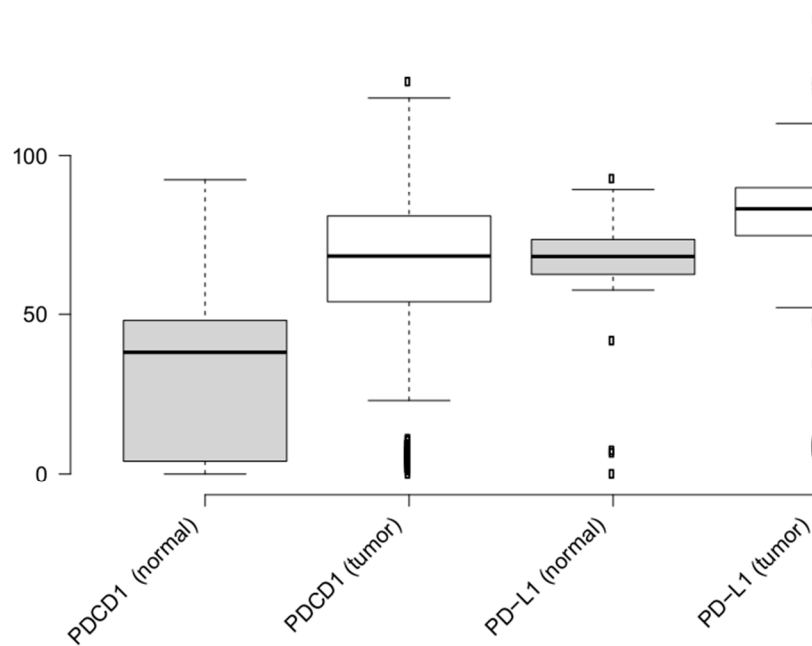

**Figure S3.** *PDCD1* and *PD-L1* overexpression in ccRCC tissues as compared to control tissues.

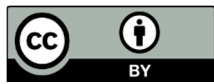

© 2020 by the authors. Submitted for possible open access publication under the terms and conditions of the Creative Commons Attribution (CC BY) license (<http://creativecommons.org/licenses/by/4.0/>).
